# Supplementary material for: An oocyte-specific ELAVL2 isoform is a translational repressor ablated from meiotically competent antral oocytes
Source: PubMed Central journal article supplement — Cell Cycle. 2014 Feb 11;13(7):1187–200. doi: 10.4161/cc.28107 (PMC4013169; doi:10.4161/cc.28107), 2014-02-11
Supplement: cc-13-1187-s02.pdf [file cc-13-1187-s02.pdf]

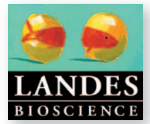

## **Supplemental Material to:**

**Katerina Chalupnikova, Petr Solc, Vadym Sulimenko,  
Radislav Sedlacek, and Petr Svoboda**

**An oocyte-specific ELAVL2 isoform is a translational  
repressor ablated from meiotically competent antral  
oocytes**

**Cell Cycle 2014; 13(7)**

**<http://dx.doi.org/10.4161/cc.28107>**

**<http://www.landesbioscience.com/journals/cc/article/28107>**

1 Title:

2 An oocyte-specific ELAVL2 isoform is a translational repressor ablated from meiotically  
3 competent antral oocytes.

4

5 Authors:

6 Katerina Chalupnikova<sup>1</sup>, Petr Solc<sup>2</sup>, Vadim Sulimenko<sup>1</sup>, Radislav Sedlacek<sup>1</sup>, and Petr Svoboda<sup>1</sup>

7

8

## APPENDIX

9

10 affiliations:

11 <sup>1</sup> Institute of Molecular Genetics, Academy of Sciences of the Czech Republic, Videnska 1083,  
12 Prague, Czech Republic

13 <sup>2</sup> Institute of Animal Physiology and Genetics, Academy of Sciences of the Czech Republic,  
14 Rumburska 89, Libechov CZ-27721, Czech Republic

15

16 Address for correspondence: svobodap@img.cas.cz

17

## 18 MATERIAL AND METHODS

### 19 Plasmids

20 HA-ELAVL2<sup>00</sup> plasmid was prepared by amplifying *Elavl2<sup>0</sup>* cDNA using primers  
21 F\_Xho\_HuB1\_SV40 and R\_Not\_HuB361\_SV40 (in the Table A1) and inserting the PCR  
22 product between Xba I and Not I sites of pSV40-HA vector (a plasmid map is available on  
23 request). NHA-ELAVL2<sup>00</sup> plasmid was prepared by inserting an annealed linker carrying the  
24 lambda phage N-peptide sequence in the AgeI site upstream of HA tag.

25 Renilla luciferase (RL) reporter is phRL-SV40 plasmid (Promega). RL-3'Ctcf was constructed by  
26 inserting PCR-amplified between XbaI and NotI sites of phRL-SV40. Primers  
27 F\_3UTR\_Ctcf\_XbaI and R\_3UTR\_Ctcf\_NotI (in the Table A1) were used for amplification  
28 3'UTR *Ctcf* from cDNA of mouse NIH3T3 cells. RL-5BoxB plasmid was previously described  
29 by Pillai et al. <sup>1</sup> and was provided by Witold Filipowicz (FMI, Basel, Switzerland). The firefly  
30 luciferase (FL) control plasmid is pGL4.10 (Promega).

31 mCherry and *Elavl2<sup>0</sup>*-mCherry plasmids were prepared by replacing HA tag with in SV40-HA  
32 and HA-ELAVL2<sup>00</sup> vectors by mCherry tag. mCherry cDNA was amplified from mCherry-pYX  
33 plasmid (a kind gift from P. Solc).

34 The pZP3-*Elavl2*-IR transgenic construct (Figure 4A) was made by inserting an inverted repeat  
35 (IR) generated from coding sequence of *Elavl2* (exons 4-7) into the XbaI site of the ZP3 cassette  
36 for transgenic RNAi as described previously <sup>2</sup>. The inverted repeat was constructed by ligating  
37 PCR products in vitro according to the published protocol <sup>2</sup>. As indicated in Figure 4A a potential  
38 polyA signal sequence (AATAAA) in sense arm of the inverted repeat was mutated to AACAAA

39 using QuickChange II XL Site-Directed Mutagenesis Kit (Stratagene). Preparation of the  
40 transgene for microinjection was performed as previously described <sup>2</sup>.

41 All plasmids were validated by sequencing. Primers and oligomers used for plasmid construction  
42 are listed in Table A1.

43

44 **FIGURE LEGENDS**45 **Figure A1**

46 ***Elavl2* splicing is generally complex. (A) A scheme of possible *Elavl2* alternative splicing**  
47 **variants in oocytes** and positions of used primers in real-time PCR analyses. The frequency of  
48 oocyte-specific *Elavl2* splicing variants was determined from the next generation sequencing data  
49 <sup>3</sup>. Mouse *Elavl2* gene is expressed from chromosome 4. (**TSS1-4** – transcription start site 1-4; **P1-**  
50 **3.fwd** – forward primer Promoter 1-3; **UTR.rev** – reverse primer UTR; **common.fwd** – forward  
51 primer common for all tested transcription variants; **skipped exon.rev** – reverse primer skipping  
52 the second to last exon) **(B) All possible ELAVL2 isoforms translated from several *Elavl2***  
53 **splicing variants.** Note that the isoform with a start codon ATG1 is almost not present in high-  
54 throughput sequencing data from mouse oocytes. **(C) There are three possible ELAVL2**  
55 **isoforms in oocytes.** They are generated from at least four *Elavl2* transcript variants. Three  
56 contain different 5'UTRs spliced to the same exon with the start codon (ATG3) and one has  
57 special either 5'UTR and the start codon (ATG2). The shortest oocyte-specific isoform marked in  
58 this paper as an ELAVL2<sup>0</sup> comes from ATG3 and has truncated “hinge” region.

59 **Figure A2**

60 **(A) Both HA- and NHA-tagged ELAVL2<sup>0</sup> proteins predominantly localize in the cytoplasm**  
61 **in transiently transfected HeLa cells.**  $\alpha$ -ELAVL2 (green) and  $\alpha$ -HA (red) antibodies were used  
62 for immunofluorescent staining. DNA staining (DAPI) is in blue. Images were taken by a  
63 confocal microscope. Scale bar = 10  $\mu$ m. **(B) Reduced amounts of NHA-ELAVL2<sup>0</sup> keep**  
64 **showing RL-5BoxB signal repression.** NIH 3T3 cells were co-transfected with constructs

65 expressing the RL-5BoxB, FL, and tagged ELAVL2<sup>O</sup> proteins in indicated plasmid amounts. The  
66 graph represents relative *Renilla* activity normalized to FL (R.L.A., mean  $\pm$  s.e.m.).

67 **Figure A3**

68 **(A) *Elavl2*<sup>O</sup> transcript variant expression in three TG mouse lines.** Real-time PCR data  
69 represent *Elavl2* expression normalized to *Hprt1* (mean  $\pm$  s.e.m., n = 3). *Elavl2* expression was  
70 set to 1 in oocytes isolated from WT animals. **(B) *Elavl2* knock-down in three transgenic**  
71 **mouse lines.** ELAVL2 is successfully down-regulated only in one transgenic mouse line –  
72 tg1629 as shown on depicted Western blot. Tubulin was used as a loading control.

73

74 **REFERENCES:**

- 75 1. Pillai RS, Artus CG, Filipowicz W. Tethering of human Ago proteins to mRNA mimics  
76 the miRNA-mediated repression of protein synthesis. *RNA* 2004; 10:1518-25.
- 77 2. Svoboda P, Stein P. RNAi experiments in mouse oocytes and early embryos. *Cold Spring*  
78 *Harb Protoc* 2009; 2009:pdb top56.
- 79 3. Smallwood SA, Tomizawa S, Krueger F, Ruf N, Carli N, Segonds-Pichon A, Sato S, Hata  
80 K, Andrews SR, Kelsey G. Dynamic CpG island methylation landscape in oocytes and  
81 preimplantation embryos. *Nat Genet* 2011; 43:811-4.  
82

Figure A1

*Elavl2* chromosome 4: 91, 250, 736 – 91, 400, 785, minus strand

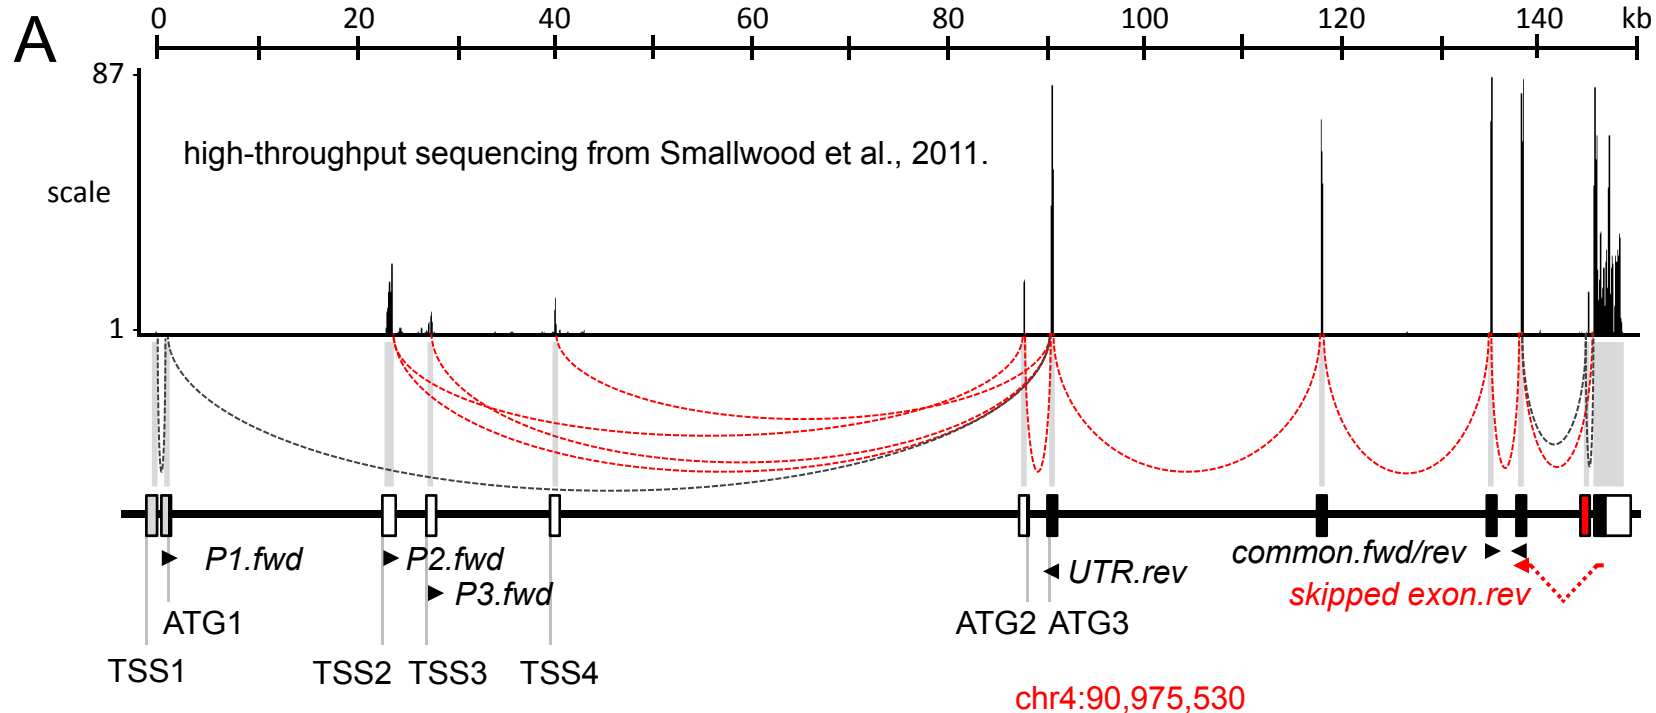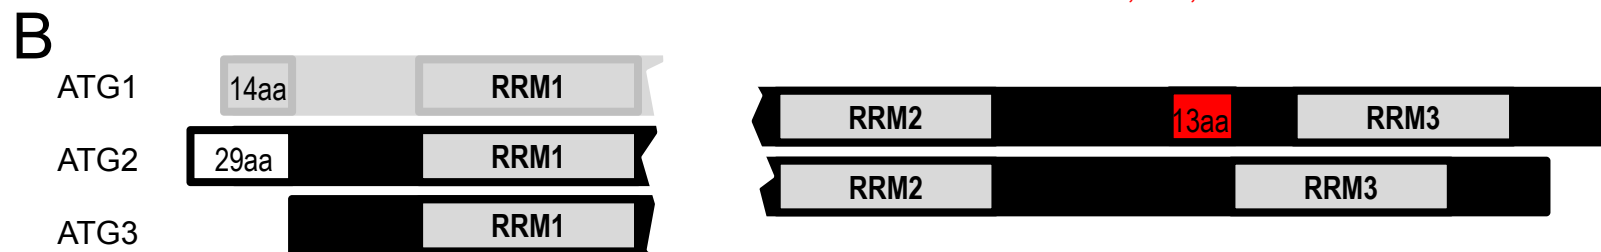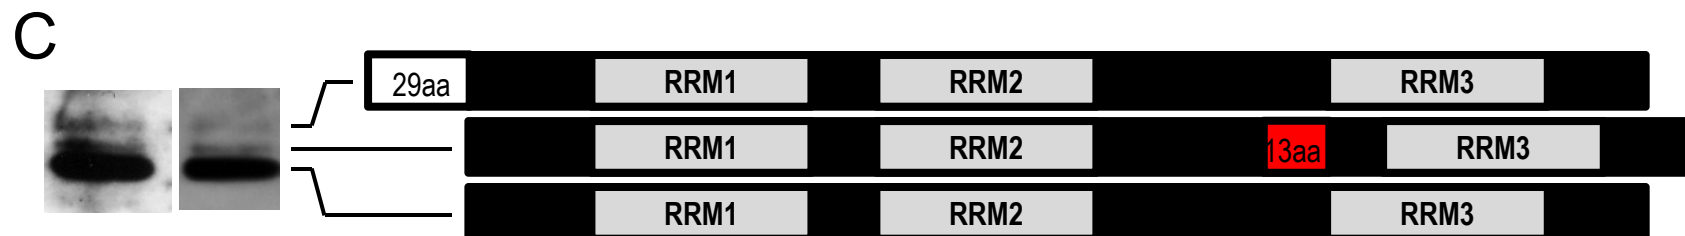



Figure A2

A

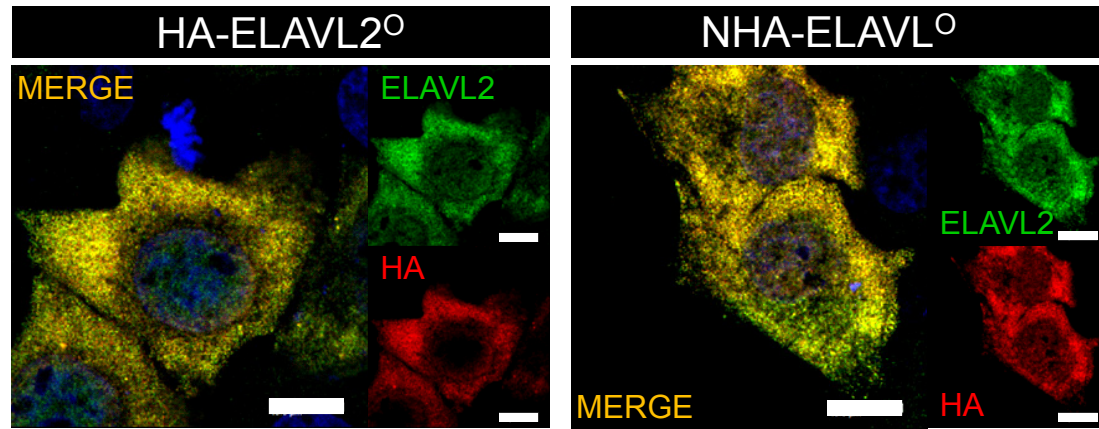

B

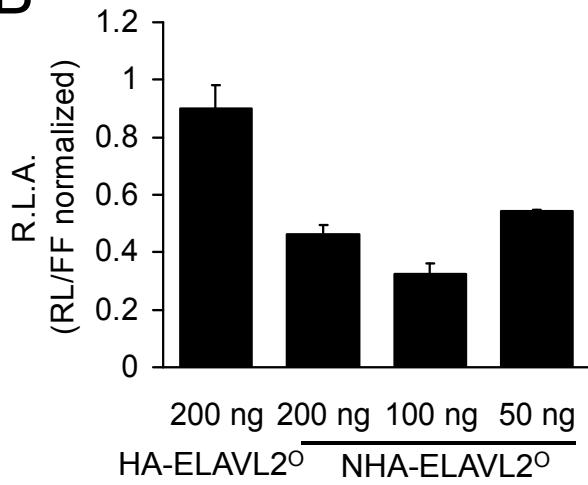

Figure A3

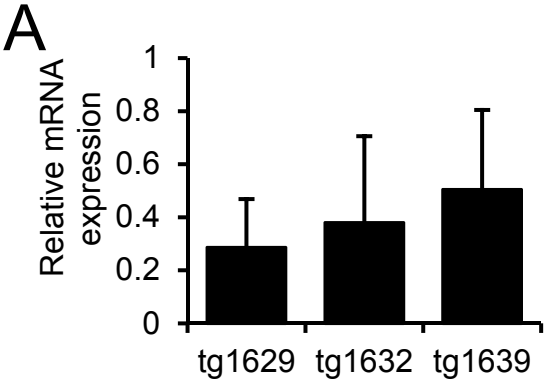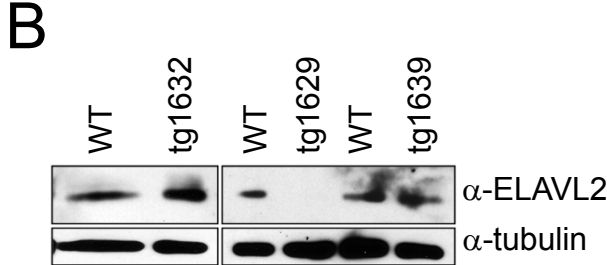

| name                                              | sequence                                                                                 | product length (bp) | note                                                         |
|---------------------------------------------------|------------------------------------------------------------------------------------------|---------------------|--------------------------------------------------------------|
| <b>pZP3-Elavl2-IR transgenic construction</b>     |                                                                                          |                     |                                                              |
| Elavl_2_long.fwd                                  | CTATGGATCCTGGAAACACAACCTGTCTAATGGGC                                                      | 520                 | Long arm IR                                                  |
| Elavl_2_short.fwd                                 | CCCAAGGATCCGGTCCAACCACTGTAAACAACAA                                                       | 460                 | Short arm of IR                                              |
| Elavl_2.rev                                       | TACCTTCTAGAAAACCTACACCCCTTGATATGC                                                        |                     |                                                              |
| Elavl_2_mutg.fwd                                  | GAGACTTCAAACCAAAACAACAAAAGTTTCCATATGCTCGCCC                                              |                     | Mutation of a potential polyA signal sequence                |
| Elavl_2_mutg.rev                                  | GGGCGAGCATAGGAAACTTTTGTGTTTGGTTGAAGTCTC                                                  |                     |                                                              |
| <b>pZP3-Elavl2-IR (inverted repeat) detection</b> |                                                                                          |                     |                                                              |
| ZP3-EGFP_GT_fwd                                   | CGGGATCACTCTCGGCAT                                                                       | 557                 |                                                              |
| ZP3-ELAVL2-IR_GT_rev                              | CACAACCTGTCTAATGGGCCAAC                                                                  |                     |                                                              |
| <b>Plasmid construction</b>                       |                                                                                          |                     |                                                              |
| Fw_HuB_cDNA2                                      | ATGGAAACACAACCTGTCTAATG                                                                  | 1044                | Elavl2 <sup>3</sup> cDNA from oocytes for TOPO-II-TA cloning |
| Rv_HuB_cDNA                                       | TTAGGCTTTGTGCGTTTTGTTTG                                                                  |                     |                                                              |
| F_Xho_HuB1_SV40                                   | GCACTCGAGATGGAAACACAACCTGTC                                                              | 1066                | Inserted in SV40-HA between XbaI and NotI                    |
| R_Not_HuB361_SV40                                 | TAAGCGGCCGCAATTAGGCTTTGTGCG                                                              |                     |                                                              |
| s_N-peptid_Agel                                   | CCGGTATGGACGCACAACACGACGACGTGAGCGTCGCGCTG<br>AGAAACAAGCTCAATGGAAAGCTGCAAAACCCACCGCTCGAGA | 90                  | Oligomers for N-peptid insertion                             |
| as_N-peptid_Agel                                  | CCGGTCTCGACGCGGTGGTTTTGCAGCTTTCCATTGAGCTTGT<br>TCTCAGCGCGACGCTCACGTCGTCGTTTTGTGCGTCCATA  |                     |                                                              |
| F_mCHERRY_Agel                                    | ATTACCGGTACCATGGTGTGAGCAAGGGCGAGGAG                                                      | 1431                | Exchange of HA tag for mCHERRY in SV40-HA vector             |
| R_mCHERRY_EcoRI                                   | ATTGAATTCCTGTACAGCTCGTCCATGCCG                                                           |                     |                                                              |
| F_3UTR_Ctcf_XbaI                                  | TTTTCTAGAGCAACAGCCATCATTACAGTCCG                                                         | 1500                | Inserted in phRL-SV40 between XbaI and NotI                  |
| R_3UTR_Ctcf_NotI                                  | TTTAGCGGCCGCGCCTGTTAATCCGTTATGATTTATTAG                                                  |                     |                                                              |
| <b>qPCR primers</b>                               |                                                                                          |                     |                                                              |
| Fw_HuBall_2                                       | TCTTGTCGACCAGGTCACCTG                                                                    | 106                 | Elavl2 common primers                                        |
| Rv_HuBall_2                                       | AGGTTTCTGGCCATTTAGGC                                                                     |                     |                                                              |
| UPL_Fw_HuB1                                       | GCAATATGAGGTTGCTGTGC                                                                     | 108                 | <i>Elavl2 P1</i>                                             |
| UPL_Rv_HuB1                                       | CAGTTGTTGTTTACAGTGTTGG                                                                   |                     |                                                              |
| F_ELAVL2_v3                                       | GTTCCGTCGTGTTCCAGTC                                                                      | 129                 | Elavl2 P2                                                    |
| R_ELAVL2_v3                                       | TTCCATGGCAGCAATTACCT                                                                     |                     |                                                              |
| F_ELAVL2_v4                                       | GCAGCTTCTTGCTCATCCTT                                                                     | 97                  | Elavl2 P3                                                    |
| R_ELAVL2_v4                                       | TGGCAGCAATTACCTGCTTT                                                                     |                     |                                                              |
| Fw_HuB3                                           | TCTTGTCGACCAGGTCACCTG                                                                    | 260                 | Elavl2 skipped exom                                          |
| Rv_HuB3                                           | TTGGAGAAAACCTACTAAAACGC                                                                  |                     |                                                              |
| Hprt1_QPCR_Fwd                                    | GTCCCAGCGTCGTGATTAG                                                                      | 224                 | Houskeeping gene                                             |
| Hprt1_QPCR_Rev                                    | CAGCAGGTCAGCAAAGAAC                                                                      |                     |                                                              |
| RL_Fwd                                            | CAGATTGTCCGCAACTACAACGCC                                                                 | 165                 | No intron spanning                                           |
| RL_Rev                                            | CTTACCCATTTTCATCTGGAGCGTC                                                                |                     |                                                              |
| FL_Fwd                                            | GCTACAAACGCTCTCATCGACAAG                                                                 | 90                  | No intron spanning                                           |
| FL_Rev                                            | GTATTTGATCAGGCTCTTCAGCCG                                                                 |                     |                                                              |
